# Supplementary material for: Morphological Medial Gastrocnemius Muscle Growth in Ambulant Children with Spastic Cerebral Palsy: A Prospective Longitudinal Study
Source: MDPI journal article supplement (doi:10.3390/jcm12041564), 2023-02-16
Supplement: s1 [file s1]

## Supplementary Materials

**Figure S1:** Observed individual profiles for the (A) absolute and (B) normalized muscle morphology for (i) the total group of children with SCP (blue=GMFCS level I, dark red=level II and pink=level III), (ii) children with GMFCS level I, (iii) children with GMFCS level II and (iv) children with GMFCS level III. SCP, spastic cerebral palsy; GMFCS, gross motor function classification system; MV, muscle volume; ml, milliliter; CSA, anatomical cross-sectional area; mm, millimeter; ML, muscle belly length; n, normalized; kg, kilogram; m, meters.

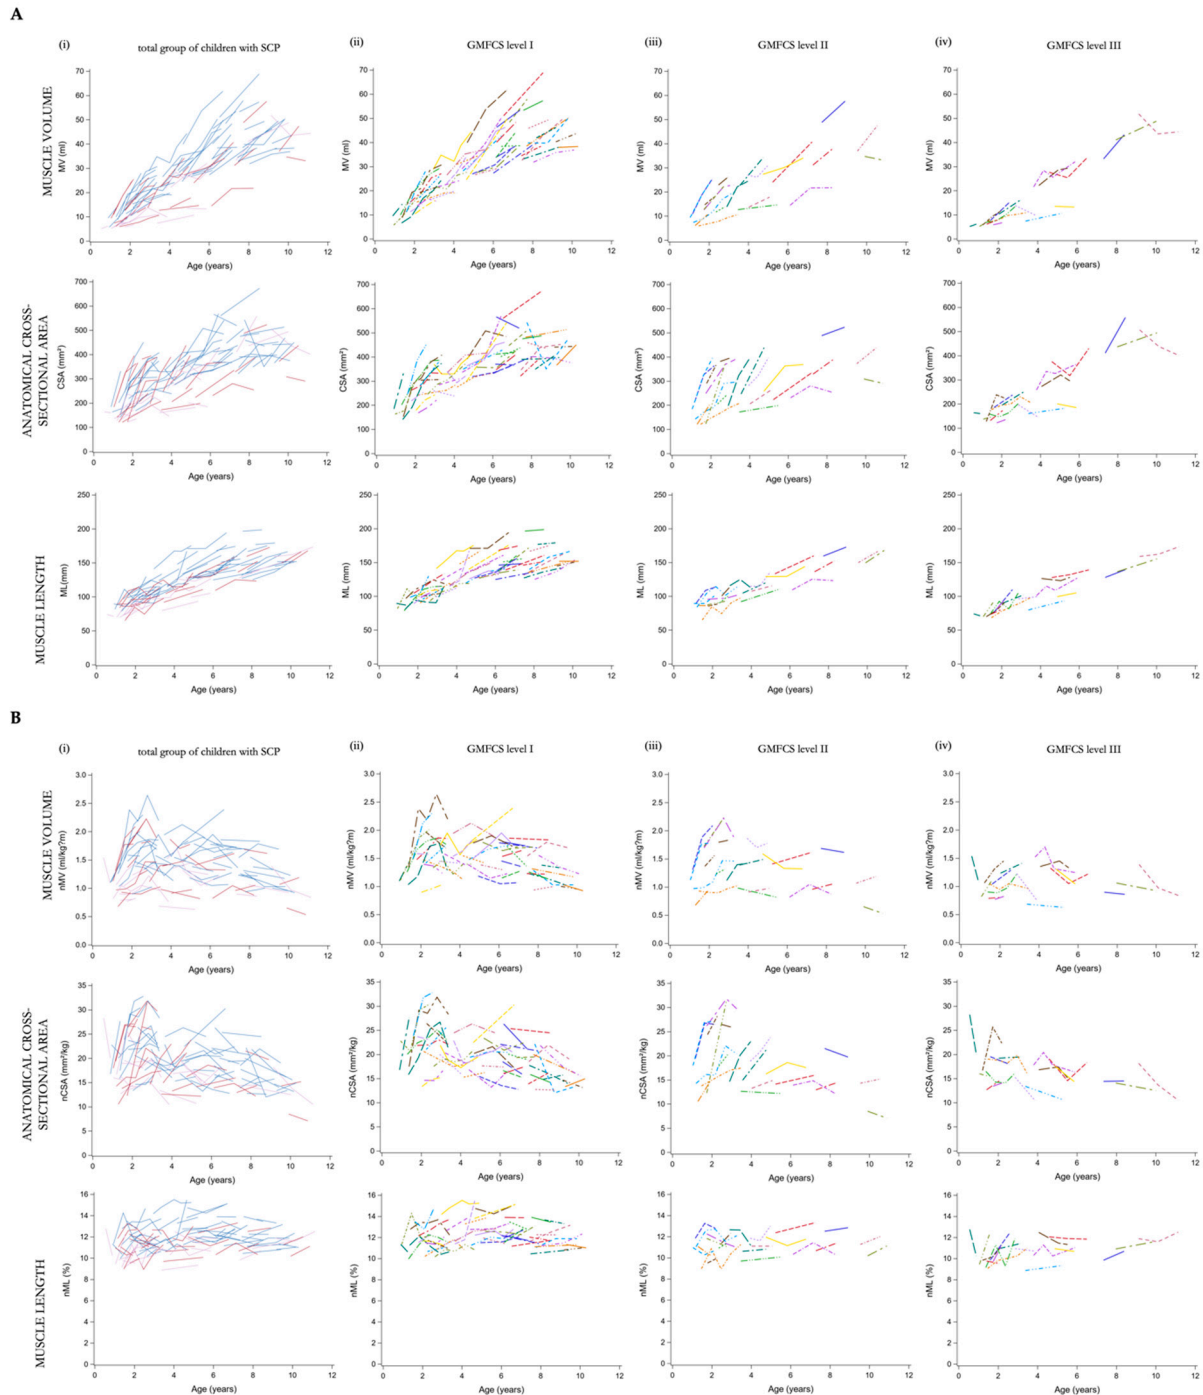

## Figure S2

**A:** Reference dataset for absolute morphological muscle outcomes and **B:** Reference dataset for normalized morphological muscle outcomes (i) in addition to the predicted trajectories for the children with GMFCS levels I (ii) (blue) and GMFCS level II-III (iii) (red). For the TD children, the individual observed values (grey dots) and median with IQR per one year-age group (green boxplots) are presented. *TD*, typically developing children; *SCP*, spastic cerebral palsy; *GMFCS*, gross motor function classification system; *IQR*, interquartile range; *MV*, muscle volume; *ml*, milliliter; *CSA*, anatomical cross-sectional area; *mm*, millimeter; *ML*, muscle belly length; *n*, normalized; *kg*, kilogram; *m*, meters.

**A**

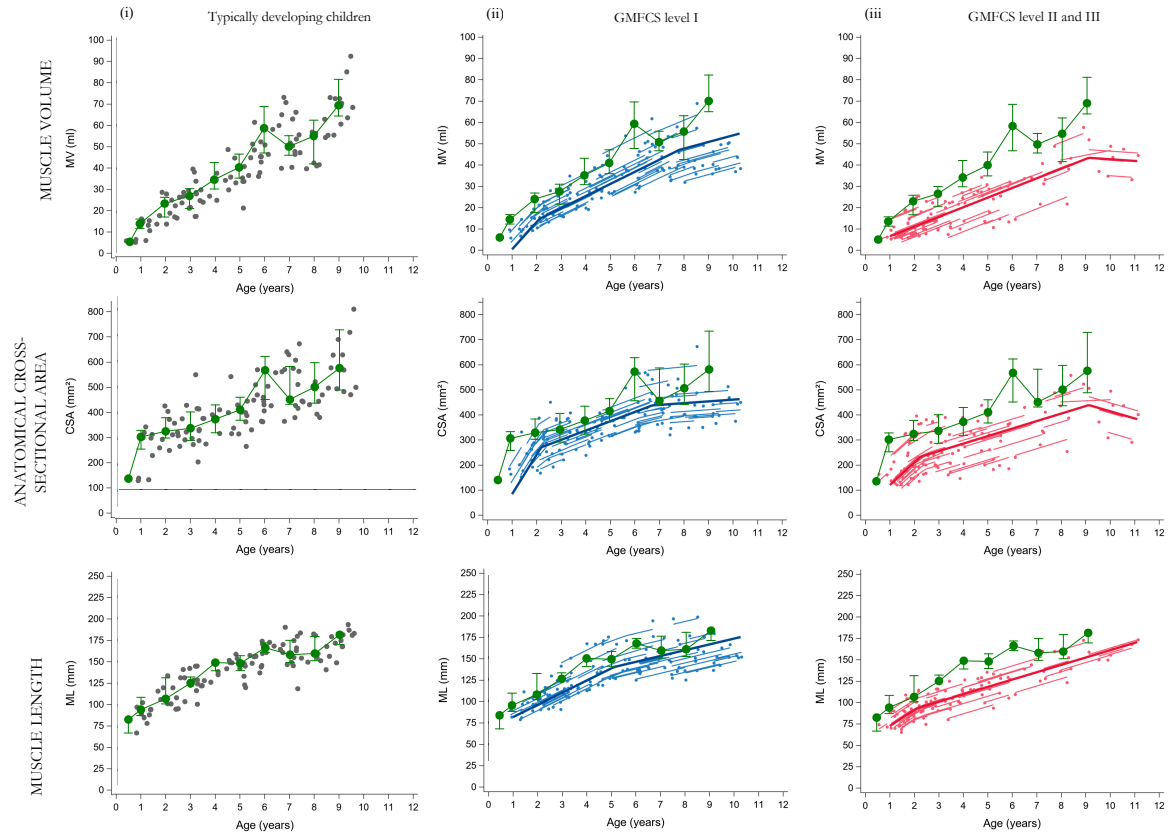

**B**

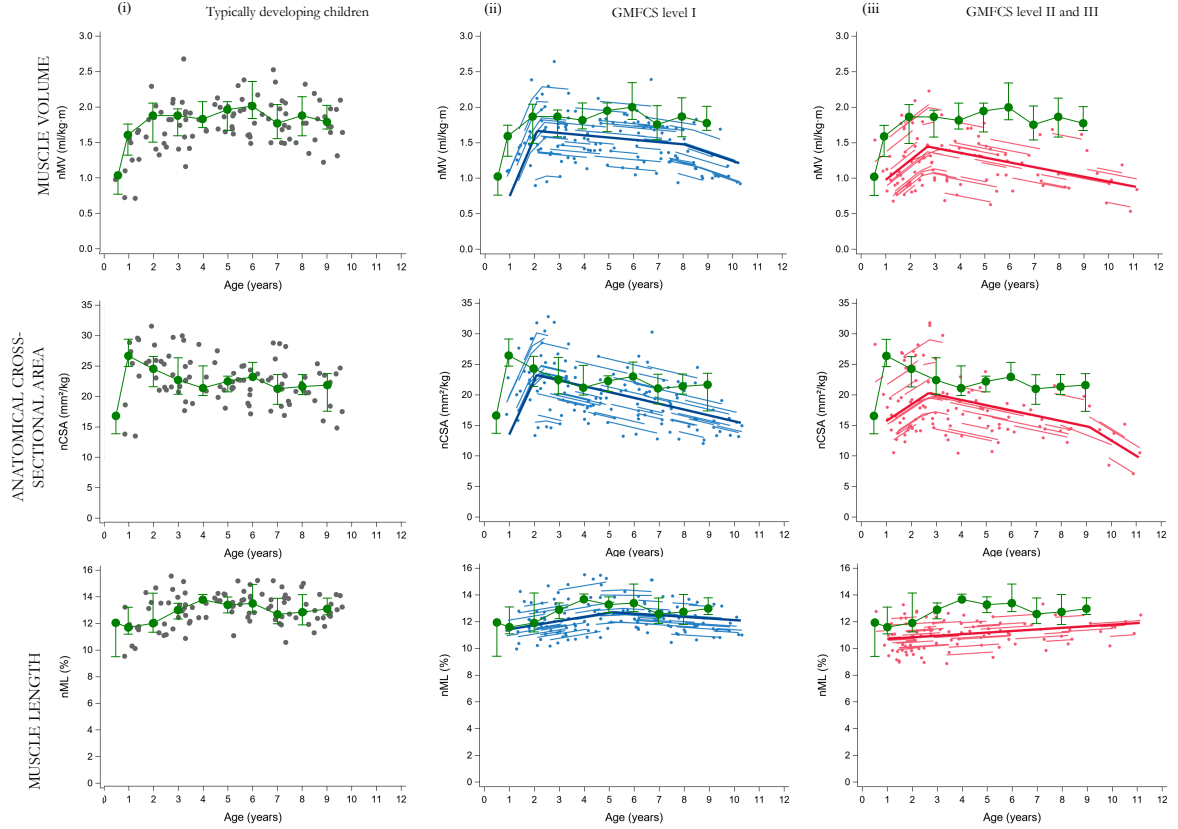

**Table S1**

Muscle morphology of retrospective cross-sectional dataset with TD children.

| Outcome                    | Number of children | Median (IQ1-IQ3)    |
|----------------------------|--------------------|---------------------|
| Age (y)                    | 102                | 5.2 (3.0-7.3)       |
| Body mass (kg)             | 102                | 18.7 (14.5-23.0)    |
| Body length (cm)           | 102                | 110.3 (93.4-123.3)  |
| MV (mL)                    | 102                | 38.7 (24.7-123.3)   |
| nMV (mL/kg·m)              | 102                | 1.8 (1.6-2.0)       |
| CSA (mm <sup>2</sup> )     | 100                | 409.3 (327.1-501.2) |
| nCSA (mm <sup>2</sup> /kg) | 100                | 22.6 (20.6-25.2)    |
| ML (mm)                    | 102                | 145.4 (121.9-161.2) |
| nML (%)                    | 102                | 13.0 (12.0-13.8)    |

Anthropometric and muscle data are presented as median (interquartile 1- interquartile 3). *TD*, typical developing children; *IQ*, interquartile; *y*, years; *kg*, kilogram; *cm*, centimeter; *MV*, muscle volume; *mL*, milliliter; *n*, normalized; *CSA*, anatomical cross-sectional area; *ML*, muscle belly length; *kg*, kilogram; *m*, meters.

**Table S2** Standard clinical care of all SCP participants.

|                                                        | <b>GMFCS level I group</b>                                                                                                                             | <b>GMFCS level II-III group</b>                                                                                                                          |
|--------------------------------------------------------|--------------------------------------------------------------------------------------------------------------------------------------------------------|----------------------------------------------------------------------------------------------------------------------------------------------------------|
| Participants (n)                                       | 47                                                                                                                                                     | 40                                                                                                                                                       |
| Use of orthoses during the day                         | Frequently used, <i>n</i> = 25<br>Not frequently used, <i>n</i> =12<br>Insoles, <i>n</i> =2<br>Not used, <i>n</i> = 8                                  | Frequently used, <i>n</i> = 22<br>Not frequently used, <i>n</i> = 11<br>Not used, <i>n</i> = 7                                                           |
| Use of orthoses during the night                       | Frequently used, <i>n</i> = 5<br>Not frequently used, <i>n</i> = 3<br>Not used, <i>n</i> = 39                                                          | Frequently used, <i>n</i> = 5<br>Not frequently used, <i>n</i> = 1<br>Not used, <i>n</i> = 34                                                            |
| Physiotherapy, min per week                            | 75 (15 to 300)                                                                                                                                         | 120 (15 to 300)                                                                                                                                          |
| Oral medication                                        | Tone reduction, <i>n</i> = 3<br>Anti-epileptics, <i>n</i> = 3<br>Others, <i>n</i> = 6<br>Vitamin D-supplement, <i>n</i> = 7<br>Not used, <i>n</i> = 29 | Tone reduction, <i>n</i> = 9<br>Anti-epileptics, <i>n</i> = 6<br>Others, <i>n</i> = 14<br>Vitamin D-supplement, <i>n</i> = 11<br>Not used, <i>n</i> = 12 |
| BoNT-A treatment in the MG muscle during follow-up (n) | 13                                                                                                                                                     | 11                                                                                                                                                       |
| Serial casting during follow-up (n)                    | 6                                                                                                                                                      | 1                                                                                                                                                        |

Frequently used indicated  $\geq 50\%$  of the day or night whereas not frequently used indicated  $<50\%$  of the day or night. The amount of physiotherapy is shown as median (minimum to maximum values). *GMFCS*, *Gross Motor Function Classification System*; *n*, *number of children*; *BoNT-A*, *botulinum neurotoxin type A*; *MG*, *medial gastrocnemius*.

Table S3

Fixed and random effects of the piecewise regressions for muscle morphology (GMFCS I n=47 and GMFCS II-III n=40).

| Outcome | Participants | Intercept           | Breakpoints (c)   |                   | Variance random intercept     | Variance residual                     |
|---------|--------------|---------------------|-------------------|-------------------|-------------------------------|---------------------------------------|
|         |              | $\alpha_0$ (CI)     | $c_1$ (CI)        | $c_2$ (CI)        | $\sigma^2(=\alpha_{1i})$ (CI) | $\sigma^2(=\varepsilon_{(1)ij})$ (CI) |
|         |              | <i>p-value</i>      | <i>p-value</i>    | <i>p-value</i>    | <i>p-value</i>                | <i>p-value</i>                        |
| MV      | GMFCS I      | 13.2 (10.6-15.7)    | 2.1 (1.8-2.5)     | 7.8 (6.6-9.0)     |                               |                                       |
|         |              | <b>&lt;0.0001</b>   | <b>&lt;0.0001</b> | <b>&lt;0.0001</b> | 6.7 (5.4-7.9)                 | 2.8 (2.5-3.2)                         |
|         | GMFCS II-III | 11.1 (9.7-12.5)     | 9.1 (9.1-9.1)     |                   | <b>&lt;0.0001</b>             | <b>&lt;0.0001</b>                     |
| nMV     | GMFCS I      | 1.57 (1.39-1.75)    | 2.1 (2.0-2.6)     | 8.0 (8.0-8.0)     |                               |                                       |
|         |              | <b>&lt;0.0001</b>   | <b>&lt;0.0001</b> | <b>&lt;0.0001</b> | 0.3 (0.3-0.3)                 | 0.1 (0.1-0.2)                         |
|         | GMFCS II-III | 1.25 (1.12-1.39)    | 2.7 (2.3-3.1)     |                   | <b>&lt;0.0001</b>             | <b>&lt;0.0001</b>                     |
| CSA     | GMFCS I      | 241.1 (209.2-273.0) | 2.2 (2.0-2.4)     | 6.7 (5.6-7.8)     |                               |                                       |
|         |              | <b>&lt;0.0001</b>   | <b>&lt;0.0001</b> | <b>&lt;0.0001</b> | 62.0 (50.6-73.3)              | 39.3 (32.6-46.0)                      |
|         | GMFCS II-III | 209.5 (172.7-246.2) | 2.7 (1.5-3.0)     | 9.1 (8.0-10.3)    | <b>&lt;0.0001</b>             | <b>&lt;0.0001</b>                     |
| nCSA    | GMFCS I      | 22.4 (20.3-24.4)    | 2.1 (2.1-2.1)     | 9.1 (7.7-10.6)    |                               |                                       |
|         |              | <b>&lt;0.0001</b>   | <b>&lt;0.0001</b> | <b>&lt;0.0001</b> | 3.7 (3.0-4.4)                 | 2.4 (2.0-2.9)                         |
|         | GMFCS II-III | 18.4 (16.4-20.4)    | 2.7 (2.0-3.5)     |                   | <b>&lt;0.0001</b>             | <b>&lt;0.0001</b>                     |
| ML      | GMFCS I      | 95.9 (92.2-99.6)    | 5.1 (4.5-5.8)     |                   |                               |                                       |
|         |              | <b>&lt;0.0001</b>   | <b>&lt;0.0001</b> |                   | 12.9 (10.1-15.7)              | 6.3 (5.1-7.5)                         |
|         | GMFCS II-III | 91.3 (86.2-96.4)    | 2.1 (1.6-2.6)     |                   | <b>&lt;0.0001</b>             | <b>&lt;0.0001</b>                     |
| nML     | GMFCS I      | 11.7 (11.3-12.2)    | 5.1 (4.0-6.2)     |                   |                               |                                       |
|         |              | <b>&lt;0.0001</b>   | <b>&lt;0.0001</b> |                   | 0.8 (0.7-1.1)                 | 0.7 (0.6-0.8)                         |
|         | GMFCS II-III | 10.8 (10.5-11.2)    |                   |                   | <b>&lt;0.0001</b>             | <b>&lt;0.0001</b>                     |

Results of the differences between slopes and breakpoints (GMFCS, I n=47, and GMFCS II-III n=40).

| Outcome | GMFCS I                         | $\Delta$ | <i>p-value</i>    | GMFCS II-III                              | $\Delta$ | <i>p-value</i>    |
|---------|---------------------------------|----------|-------------------|-------------------------------------------|----------|-------------------|
| MV      | $\beta_{1,I}$ vs. $\beta_{2,I}$ | 7.08     | <b>0.0021</b>     | $\beta_{1,II-III}$ vs. $\beta_{2,II-III}$ | 5.32     | <b>0.0255</b>     |
|         | $\beta_{2,I}$ vs. $\beta_{3,I}$ | 2.57     | <b>0.0278</b>     |                                           |          |                   |
|         | $\beta_{1,I}$ vs. $\beta_{3,I}$ | 9.65     | <b>0.0001</b>     |                                           |          |                   |
| nMV     | $\beta_{1,I}$ vs. $\beta_{2,I}$ | 0.86     | <b>&lt;0.0001</b> | $\beta_{1,II-III}$ vs. $\beta_{2,II-III}$ | 0.35     | <b>&lt;0.0001</b> |
|         | $\beta_{2,I}$ vs. $\beta_{3,I}$ | 0.09     | <b>0.0222</b>     |                                           |          |                   |
|         | $\beta_{1,I}$ vs. $\beta_{3,I}$ | 0.95     | <b>&lt;0.0001</b> |                                           |          |                   |
| CSA     | $\beta_{1,I}$ vs. $\beta_{2,I}$ | 121.4    | <b>&lt;0.0001</b> | $\beta_{1,II-III}$ vs. $\beta_{2,II-III}$ | 58.8     | <b>0.0050</b>     |
|         | $\beta_{2,I}$ vs. $\beta_{3,I}$ | 30.0     | <b>0.0095</b>     | $\beta_{2,II-III}$ vs. $\beta_{3,II-III}$ | 58.1     | <b>0.0067</b>     |
|         | $\beta_{1,I}$ vs. $\beta_{3,I}$ | 151.4    | <b>&lt;0.0001</b> | $\beta_{1,II-III}$ vs. $\beta_{3,II-III}$ | 116.9    | <b>0.0112</b>     |
| nCSA    | $\beta_{1,I}$ vs. $\beta_{2,I}$ | 9.83     | <b>&lt;0.0001</b> | $\beta_{1,II-III}$ vs. $\beta_{2,II-III}$ | 3.57     | <b>0.0106</b>     |
|         |                                 |          |                   | $\beta_{2,II-III}$ vs. $\beta_{3,II-III}$ | 1.65     | <b>0.0424</b>     |
|         |                                 |          |                   | $\beta_{1,II-III}$ vs. $\beta_{3,II-III}$ | 5.21     | <b>0.0005</b>     |
| ML      | $\beta_{1,I}$ vs. $\beta_{2,I}$ | 7.43     | <b>&lt;0.0001</b> | $\beta_{1,II-III}$ vs. $\beta_{2,II-III}$ | 10.3     | <b>0.0089</b>     |
| nML     | $\beta_{1,I}$ vs. $\beta_{2,I}$ | 0.43     | <b>0.0117</b>     | NA                                        |          |                   |

P-values in bold indicate significance level at  $p < 0.05$ . The following symbols represent:  $\alpha$  = response at the age of 2 years, CI= 95% confidence interval,  $c$  = age (years) of the breakpoint,  $\sigma^2(a_{1i})$  = variance of random intercept and  $\sigma^2(\epsilon_{(1)ij})$  = variance of residual,  $\beta$  = change in outcome per year and  $\Delta$  = difference score. GMFCS, gross motor function classification system; n, number; MV, muscle volume; n, normalized; CSA, anatomical cross-sectional area; ML, muscle belly length; NA, not applicable.
